# Supplementary material
Source: PubMed Central journal article supplement (PMC1768578)
Supplement: heart_90_12_1460__1.pdf [file heart_90_12_1460__1.pdf]

**For Office Use Only**

**Patient ID:** \_\_\_\_\_

**Hospital:** \_\_\_\_\_

**Date received:** \_\_\_\_\_

## **CORONARY REVASCULARISATION OUTCOME QUESTIONNAIRE (CROQ-CABG)**

**INSTRUCTIONS:** We are interested in finding out how you are now before the heart operation (**coronary artery bypass graft surgery**) you are going to have. We would be grateful if you could help us by filling out this questionnaire. All of the information you provide is **COMPLETELY CONFIDENTIAL**. Please be sure to answer all questions.

1. During the past 4 weeks, how much were you bothered by each of the following problems related to your **heart condition**? (Please tick one box on each line.)

|                                                                                                            | A lot                    | Quite<br>a bit           | Moderately               | A<br>little              | Not at all               |
|------------------------------------------------------------------------------------------------------------|--------------------------|--------------------------|--------------------------|--------------------------|--------------------------|
| Chest pain due to angina                                                                                   | <input type="checkbox"/> |
| Discomfort in your chest due to angina                                                                     | <input type="checkbox"/> |
| Shortness of breath                                                                                        | <input type="checkbox"/> |
| Angina pain that radiates to other parts of your body (eg arms, shoulders, hands, neck, throat, jaw, back) | <input type="checkbox"/> |
| Palpitations (strong or irregular heart beat)                                                              | <input type="checkbox"/> |

2. During the past 4 weeks, on average, how many times have you taken nitros (nitroglycerin tablets or spray) for your **chest pain, chest tightness or angina**? (Please tick only one box.)

|                            |                          |                                                     |                          |                          |                               |
|----------------------------|--------------------------|-----------------------------------------------------|--------------------------|--------------------------|-------------------------------|
| <input type="checkbox"/>   | <input type="checkbox"/> | <input type="checkbox"/>                            | <input type="checkbox"/> | <input type="checkbox"/> | <input type="checkbox"/>      |
| 4 or more<br>times per day | 1-3 times<br>per day     | 3 or more<br>times per<br>week but not<br>every day | 1-2 times<br>per week    | Less than<br>once a week | None over the<br>past 4 weeks |

3. During the past 4 weeks, have you had **chest pain, chest tightness or angina**:  
(Please tick only one box.)

|                          |                          |                          |                          |
|--------------------------|--------------------------|--------------------------|--------------------------|
| <input type="checkbox"/> | <input type="checkbox"/> | <input type="checkbox"/> | <input type="checkbox"/> |
| At rest?                 | On exertion?             | At rest and on exertion? | Not at all?              |

4. During the past 4 weeks, how much trouble has your **heart condition** caused you?  
(Please tick only one box.)

|                          |                          |                          |                          |                          |
|--------------------------|--------------------------|--------------------------|--------------------------|--------------------------|
| <input type="checkbox"/> |
| A lot                    | Quite a bit              | Some                     | A little                 | None                     |

5. The following questions ask about activities which you might do during a typical day. During the past 4 weeks, has your **heart condition** limited you in your usual daily activities? Please indicate whether your heart condition limits you a lot, limits you a little, or does not limit you at all in the activities listed below. (Please tick one box on each line.)

| <u>ACTIVITIES</u>                                                                                       | Yes,<br>Limited A<br>Lot | Yes,<br>Limited A<br>Little | No, Not<br>Limited At<br>All |
|---------------------------------------------------------------------------------------------------------|--------------------------|-----------------------------|------------------------------|
| <b>Moderate activities</b> , such as moving a table, pushing a vacuum cleaner, bowling, or playing golf | <input type="checkbox"/> | <input type="checkbox"/>    | <input type="checkbox"/>     |
| Lifting or carrying groceries                                                                           | <input type="checkbox"/> | <input type="checkbox"/>    | <input type="checkbox"/>     |
| Climbing <b>several</b> flights of stairs                                                               | <input type="checkbox"/> | <input type="checkbox"/>    | <input type="checkbox"/>     |
| Climbing <b>one</b> flight of stairs                                                                    | <input type="checkbox"/> | <input type="checkbox"/>    | <input type="checkbox"/>     |
| Bending, kneeling or stooping                                                                           | <input type="checkbox"/> | <input type="checkbox"/>    | <input type="checkbox"/>     |
| Walking <b>half a mile</b>                                                                              | <input type="checkbox"/> | <input type="checkbox"/>    | <input type="checkbox"/>     |
| Walking <b>one hundred yards</b>                                                                        | <input type="checkbox"/> | <input type="checkbox"/>    | <input type="checkbox"/>     |
| Bathing or dressing yourself                                                                            | <input type="checkbox"/> | <input type="checkbox"/>    | <input type="checkbox"/>     |

6. The next questions ask about the impact of your **heart condition** on your family and friends and the extent to which it has interfered with your social activities. During the past 4 weeks, how often have you experienced the following as a result of your **heart condition**:  
(Please tick one box on each line.)

|                                                                                            | All of the time          | Most of the time         | Some of the time         | A little of the time     | None of the time         |
|--------------------------------------------------------------------------------------------|--------------------------|--------------------------|--------------------------|--------------------------|--------------------------|
| Family or friends being overprotective toward you?                                         | <input type="checkbox"/> |
| Feeling like you are a burden on others?                                                   | <input type="checkbox"/> |
| Feeling restricted in your social activities (like visiting with friends, relatives, etc)? | <input type="checkbox"/> |
| Feeling worried about going too far from home?                                             | <input type="checkbox"/> |

7. The next questions ask about your feelings about your **heart condition**. During the past 4 weeks, how often have you felt: (Please tick one box on each line.)

|                                                                          | All of the time          | Most of the time         | Some of the time         | A little of the time     | None of the time         |
|--------------------------------------------------------------------------|--------------------------|--------------------------|--------------------------|--------------------------|--------------------------|
| Worried about your heart condition?                                      | <input type="checkbox"/> |
| Worried about doing too much or over-doing it?                           | <input type="checkbox"/> |
| Worried that you might have a heart attack or die suddenly?              | <input type="checkbox"/> |
| Frightened by the pain or discomfort of your heart condition?            | <input type="checkbox"/> |
| Uncertain about the future?                                              | <input type="checkbox"/> |
| Depressed?                                                               | <input type="checkbox"/> |
| Frustrated or impatient?                                                 | <input type="checkbox"/> |
| That your heart condition interfered with your enjoyment of life?        | <input type="checkbox"/> |
| That it was difficult to keep a positive outlook about your health?      | <input type="checkbox"/> |
| That it was difficult to plan ahead (eg vacations, social events, etc.)? | <input type="checkbox"/> |

8. The next questions ask about problems related to your **heart condition**. During the past 4 weeks, how much of the time did you: (Please tick one box on each line.)

|                                                                                                                  | All of the time          | Most of the time         | A good bit of the time   | Some of the time         | A little of the time     | None of the time         |
|------------------------------------------------------------------------------------------------------------------|--------------------------|--------------------------|--------------------------|--------------------------|--------------------------|--------------------------|
| Have difficulty reasoning and solving problems, for example making plans, making decisions, learning new things? | <input type="checkbox"/> |
| Forget, for example things that happened recently, where you put things or appointments?                         | <input type="checkbox"/> |
| Have difficulty doing activities involving concentration and thinking?                                           | <input type="checkbox"/> |

9. Is there anything else you would like to tell us about your **heart condition** or **heart operation** that is not covered in this questionnaire? If so, please write below.

---

---

---

---

---

**Please check that you have answered all the questions on each page.**

**THANK YOU FOR YOUR HELP**
